# Supplementary material
Source: Springer Nature journal article supplement (https://www.springermedizin.de/resource/supplementary/12877_2010_779_MOESM1_ESM.pdf/9440264)
Supplement: MOESM1 [file 9440264]

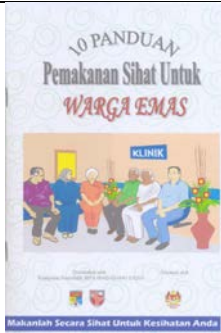

Figure 1a. Booklet on ‘10 Guides for Healthy Eating for Elderly People’

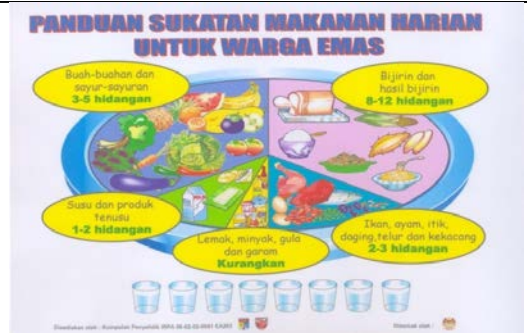

Figure 1b. Placemat on ‘Food Plate for Elderly People’

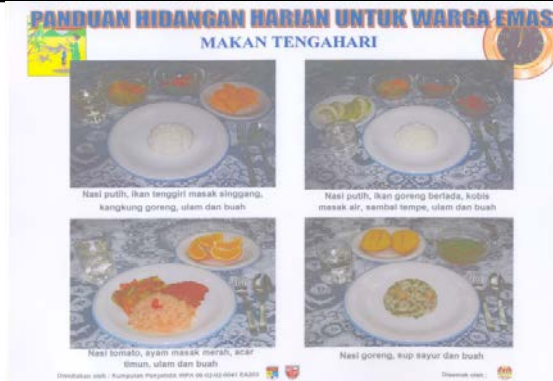

Figure 1c. Sample of Placemat ‘Food Guide for Elderly People’

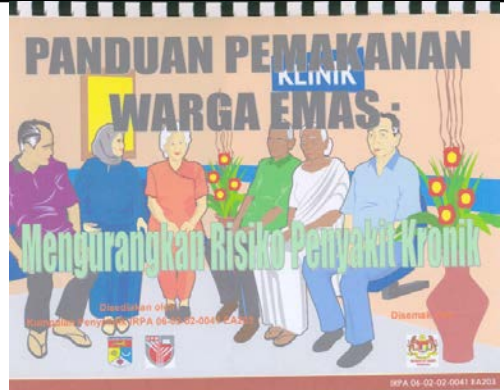

Figure 1d. Flipchart ‘Nutrition Guide for Elderly People: Reducing Risk of Chronic Diseases’
